# Supplementary material
Source: MDPI journal article supplement (https://www.mdpi.com/2073-4433/12/1/100)
Supplement: s1 [file s1]

# Potential of ARIMA-MLP, ARIMA-SVM, DT, and CatBoost for PM<sub>2.5</sub> and PM<sub>10</sub> prediction in Bangladesh

Shihab Ahmad Shahriar <sup>1</sup>, Imrul Kayes <sup>1</sup>, Kamrul Hasan <sup>1</sup>, Mahadi Hasan <sup>1</sup>, Rashik Islam <sup>2</sup>, Norrimi Rosaida Awang<sup>3</sup>, Zulhazman Humzah<sup>3</sup>, Aweng Eh Rak<sup>3</sup> and Mohammed Abdus Salam <sup>1,\*</sup>

<sup>1</sup> Department of Environmental Science and Disaster Management, Noakhali Science and Technology University, Noakhali 3814, Bangladesh; shihab0212@gmail.com (S.A.S); kamrulh9560@gmail.com (K.H.); ikayes1@lakeheadu.ca (I.K.); mahadihasan.nstu10@gmail.com (M.H.)

<sup>2</sup> Department of Computer Science and Media, Beuth University of Applied Sciences, Berlin, Germany; s76888@beuth-hochschule.de

<sup>3</sup> Faculty of Earth Science, University Malaysia Kelantan, Jeli Campus, 17600 Jeli, Kelantan, Malaysia; norrimi.a@umk.edu.my, zulhazman@umk.edu.my, aweng@umk.edu.my

\*Correspondence: s\_salam1978@yahoo.com/masalam.esdm@nstu.edu.bd ; Tel.: +880-191-763-5348

## List of figures

**Figure S1.** Monthly and daily pattern of particulate matters across the air monitoring stations from 2013-2019.

**Figure S2.** Season-wise correlation among the meteorological variables and atmospheric pollutants in Dhaka, Narayanganj, and Gazipur.

**Figure S3.** ACF and PACF plot of daily PM<sub>2.5</sub> concentration at the air monitoring stations

**Figure S4.** Residual plot of the models

**Figure S5.** Diagnostic test of residuals from the models (Normal Q-Q plot)

**Figure S6.** Variable importance for predicting PM<sub>2.5</sub> across A. Dhaka, B. Narayanganj, and C. Gazipur

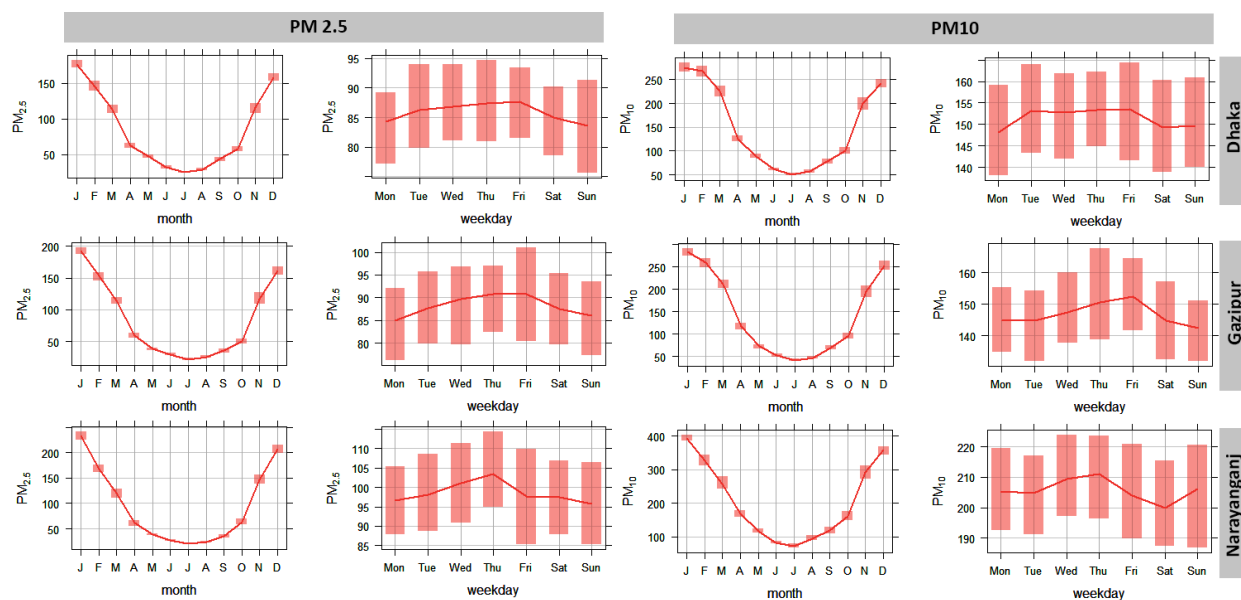

**Figure S1.** Monthly and daily pattern of particulate matters across the air monitoring stations from 2013-2019

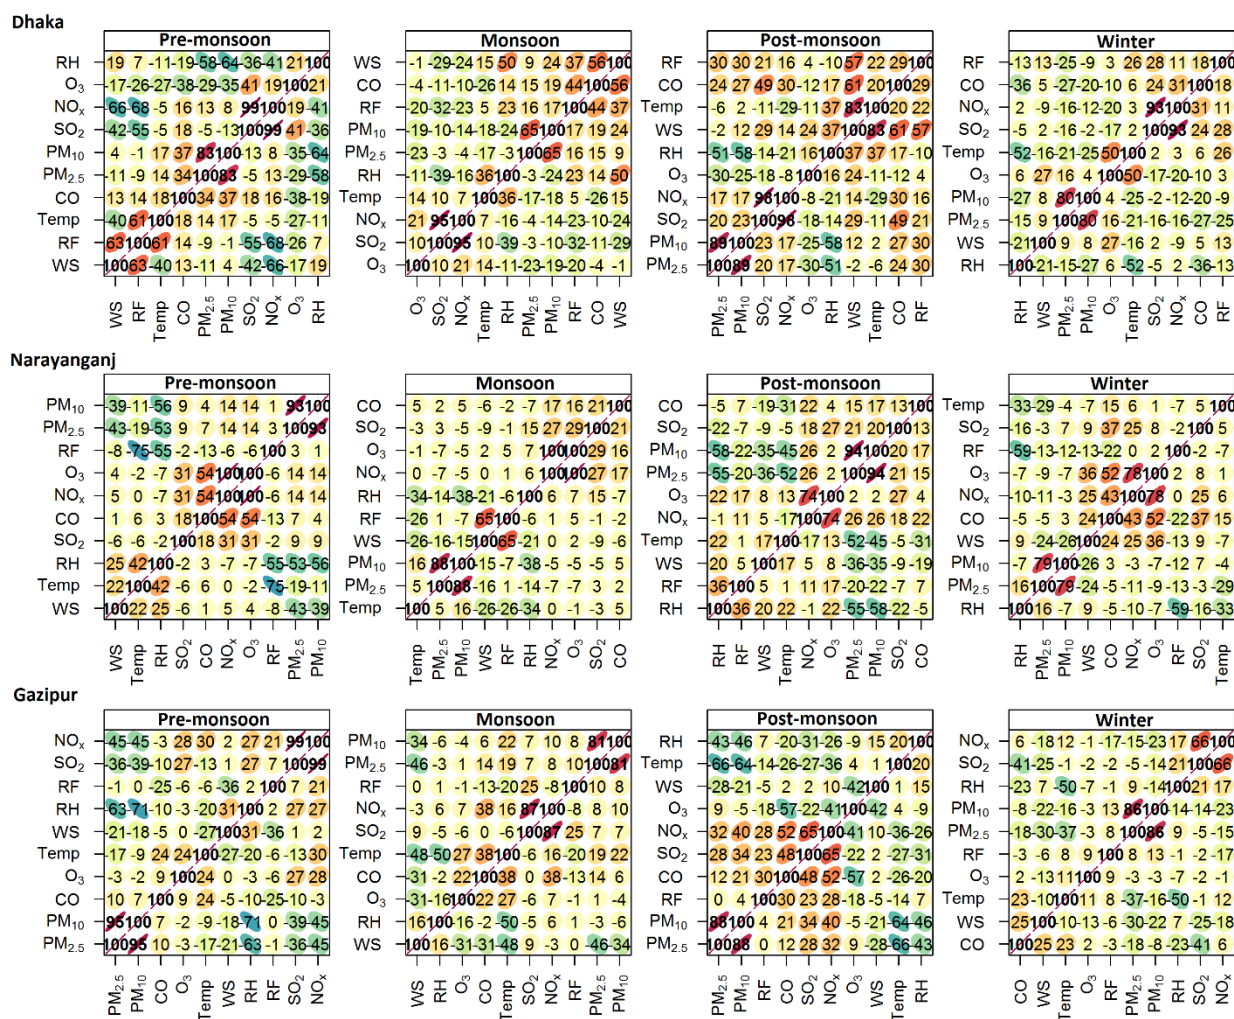

**Figure S2.** Season-wise correlation among the meteorological variables and atmospheric pollutants in Dhaka, Narayanganj, and Gazipur.

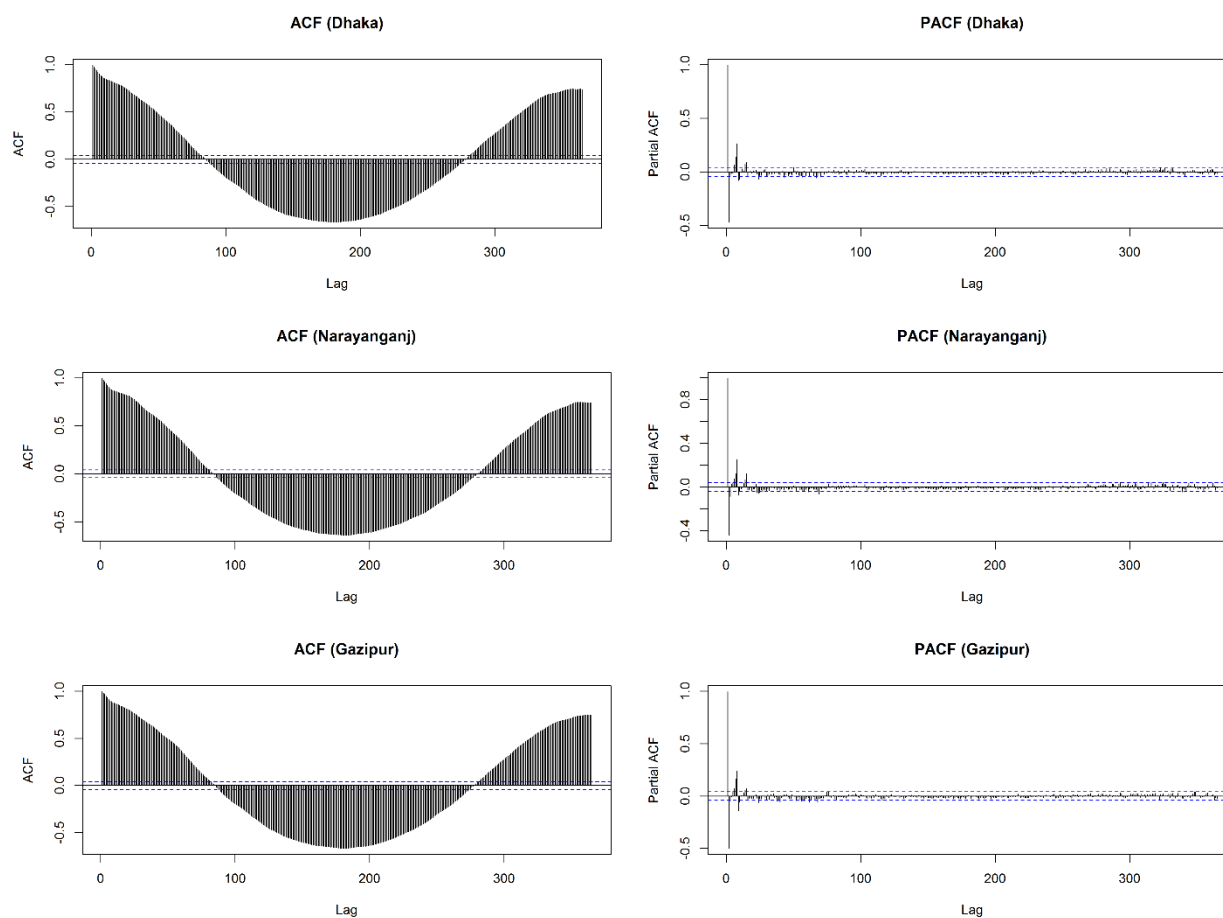

**Figure S3.** ACF and PACF plot of daily PM<sub>2.5</sub> concentration at the air monitoring stations

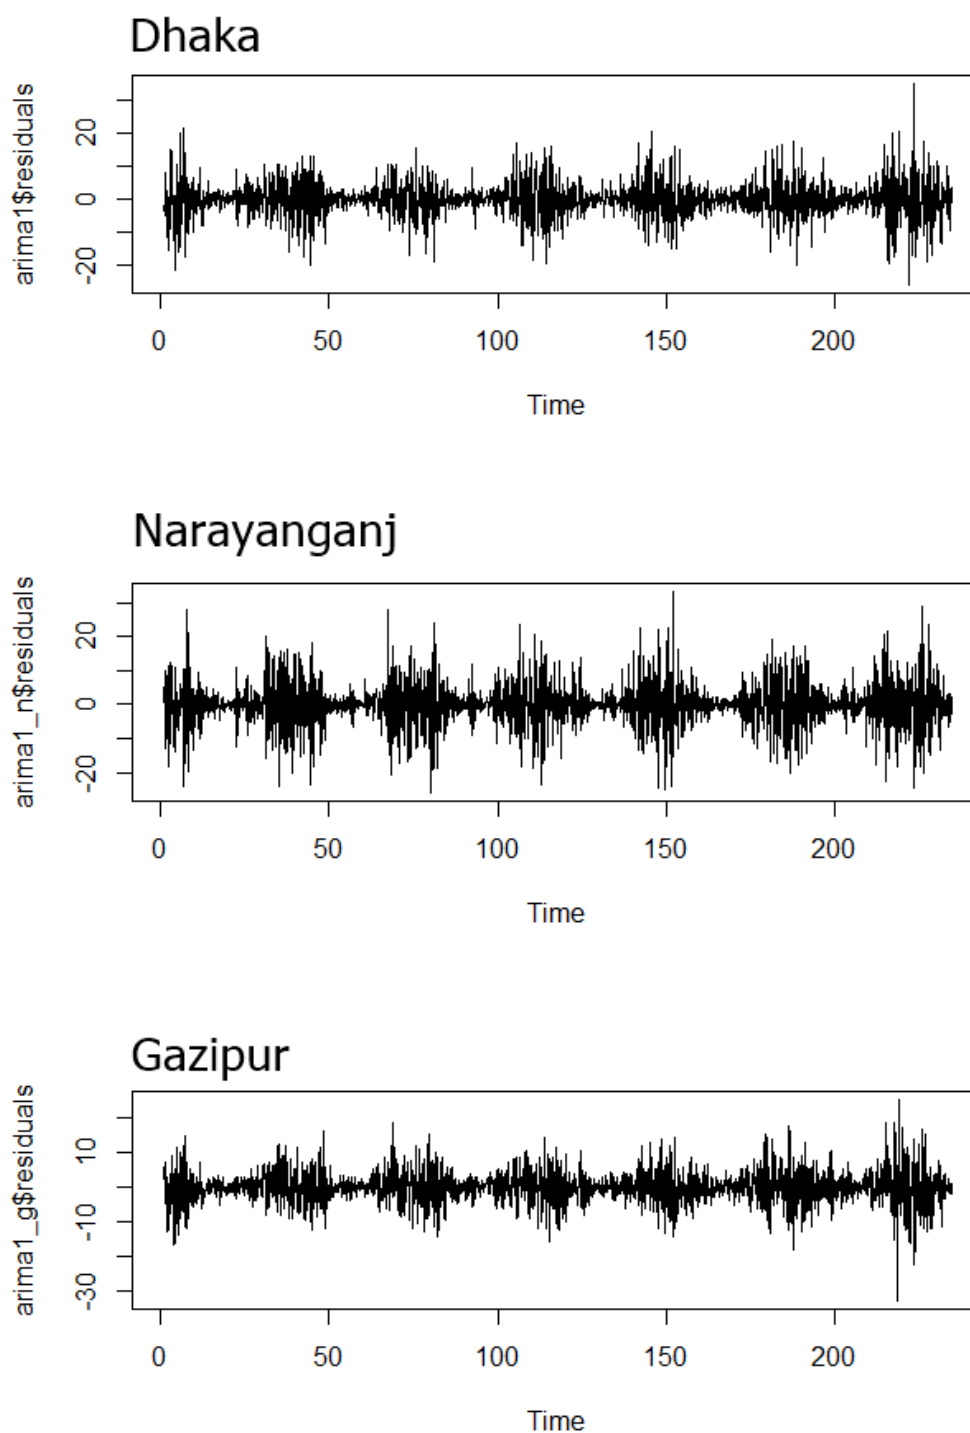

**Figure S4.** Residual plot of the models

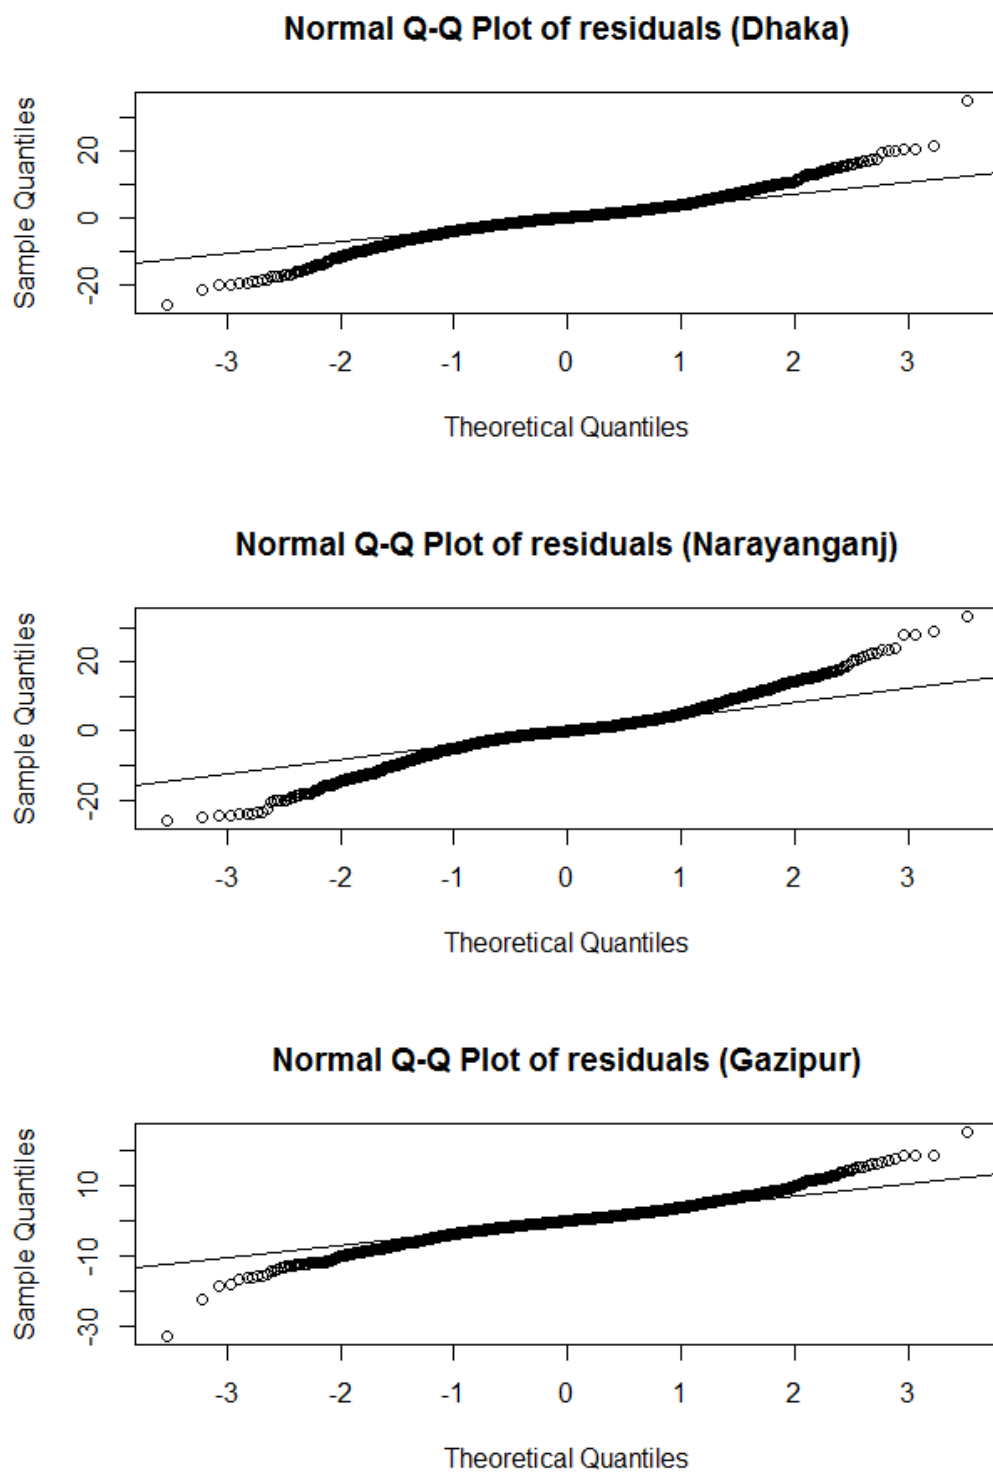

**Figure S5.** Diagnostic test of residuals from the models (Normal Q-Q plot)

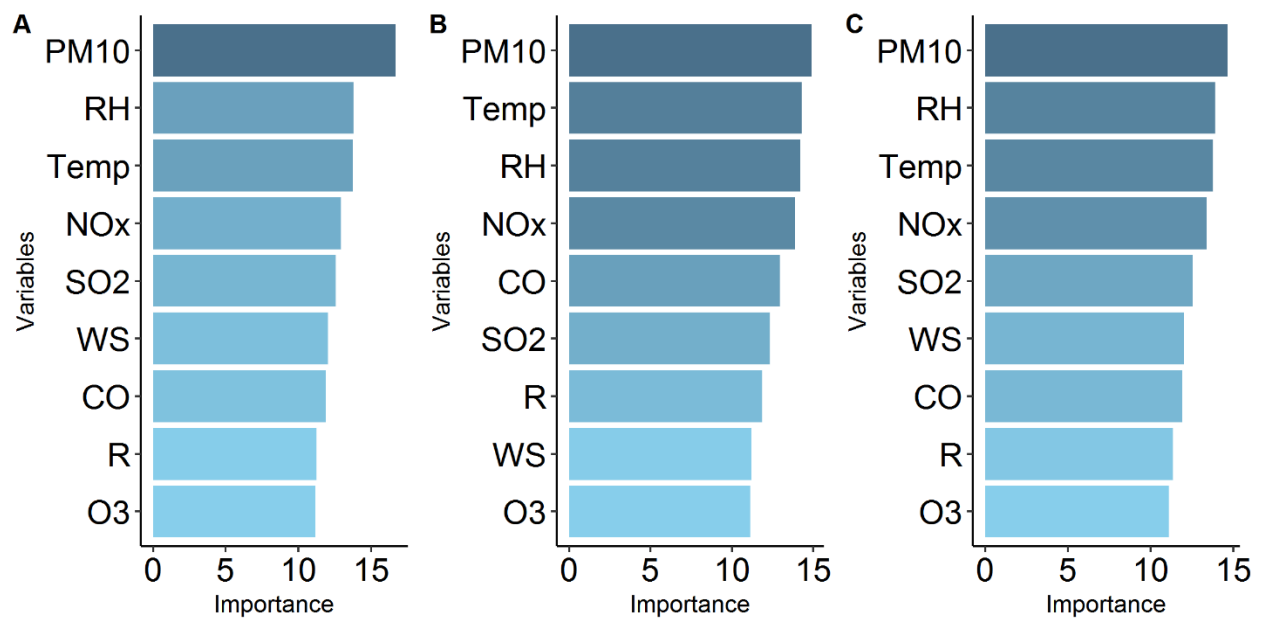

**Figure S6.** Variable importance for predicting  $PM_{2.5}$  across A. Dhaka, B. Narayanganj, and C. Gazipur
